# Supplementary material for: Three-dimensional carbon coated and high mass-loaded NiO@Ni foam anode with high specific capacity for lithium ion batteries
Source: Royal Society of Chemistry journal article supplement (doi:10.1039/d4ra07119k), 2024-01-01

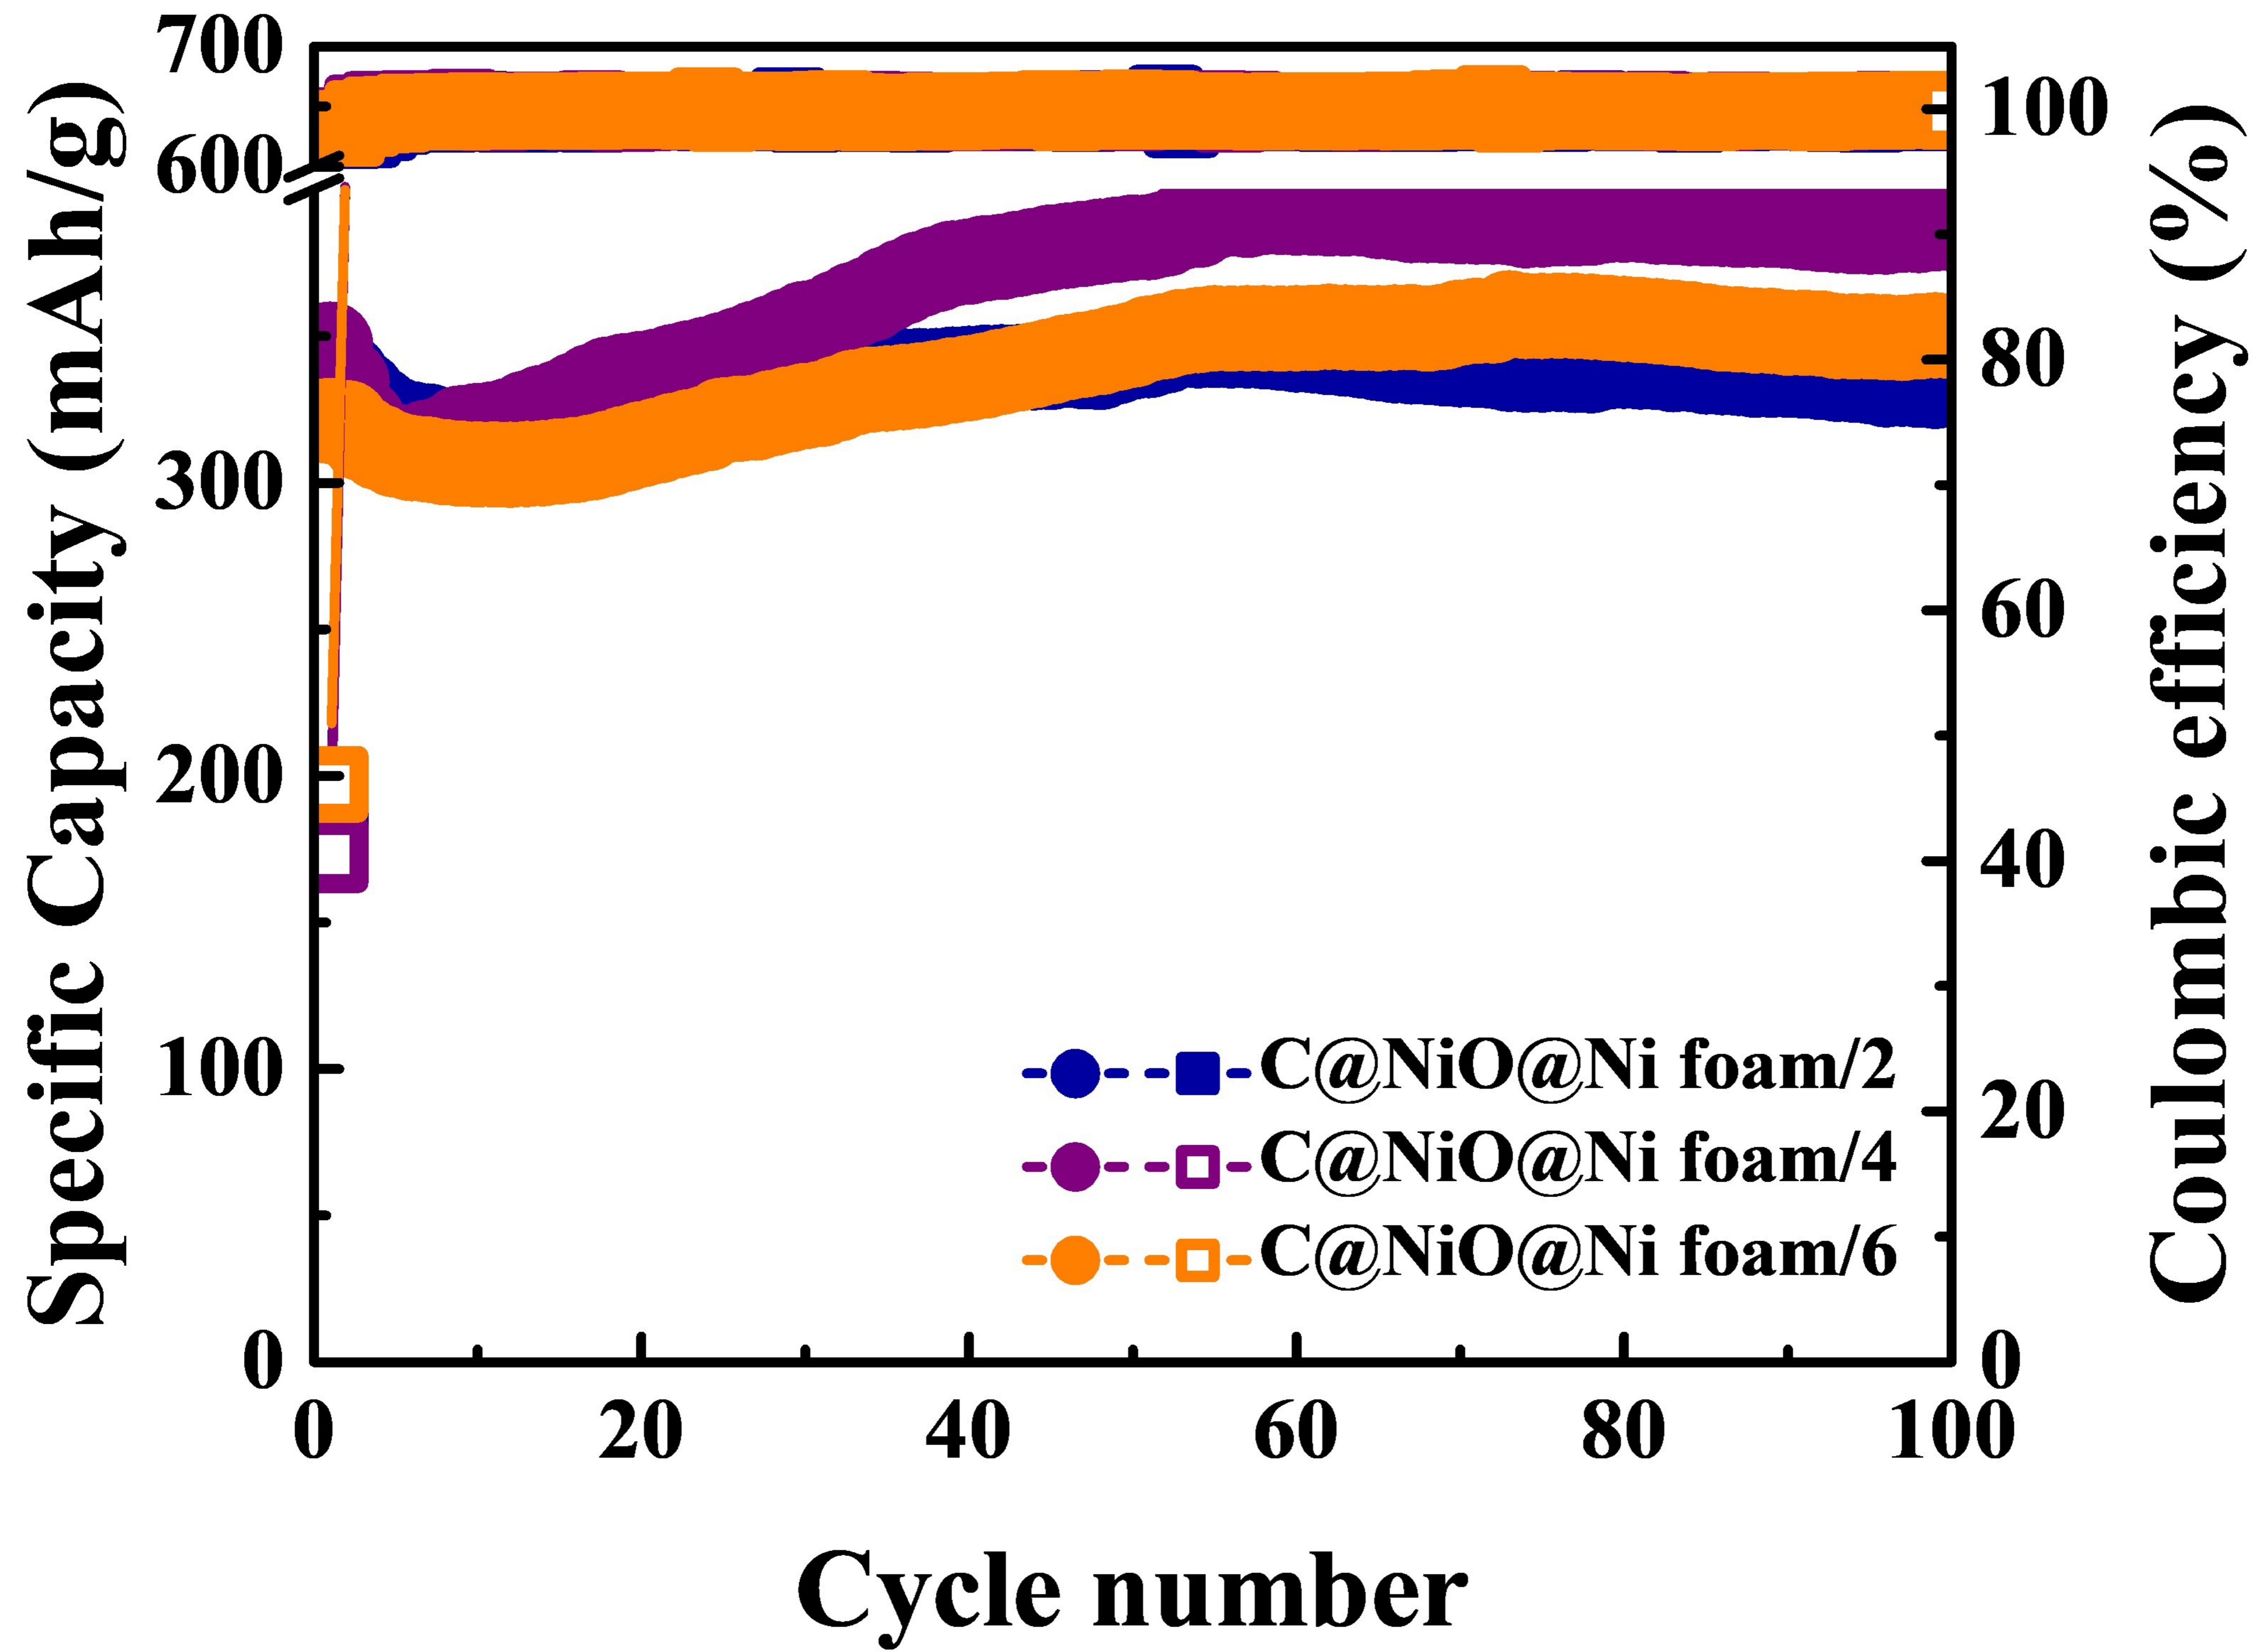

Supplement: d4ra07119k2.pdf [file d4ra07119k2.pdf]
