# Supplementary material for: Three-dimensional carbon coated and high mass-loaded NiO@Ni foam anode with high specific capacity for lithium ion batteries
Source: Royal Society of Chemistry journal article supplement (doi:10.1039/d4ra07119k), 2024-01-01
Supplement: d4ra07119k4.pdf [file d4ra07119k4.pdf]

## Supporting Information

### Three-Dimensional Carbon Coated and High Mass-Loaded NiO@Ni foam Anode with High Specific Capacity for Lithium Ion Battery

Nurbolat Issatayev,<sup>a</sup> Diana Abdumutaliyeva,<sup>b</sup> Yerbolat Tashenov,<sup>b</sup> Dossym Yeskozha,<sup>a</sup> Adilkhan Seipiyev,<sup>a</sup> Zhumabay Bakenov\*<sup>a, c, d</sup> and Arailym Nurpeissova\*<sup>a, c</sup>

<sup>a</sup> Institute of Batteries, 53 Kabanbay Batyr Ave., Astana 010000, Kazakhstan

<sup>b</sup> Department of Chemistry, L.N. Gumilyov Eurasian National University, 2 Satpayev St., Astana, 010008 Kazakhstan

<sup>c</sup> National Laboratory Astana, Nazarbayev University, 53 Kabanbay Batyr Ave., Astana, 010000, Kazakhstan

<sup>d</sup> Department of Chemical and Materials Engineering, Nazarbayev University, 53 Kabanbay Batyr Ave., Astana, 010000, Kazakhstan

\* Corresponding Author: [arailym.nurpeissova@nu.edu.kz](mailto:arailym.nurpeissova@nu.edu.kz); [zbakenov@nu.edu.kz](mailto:zbakenov@nu.edu.kz)

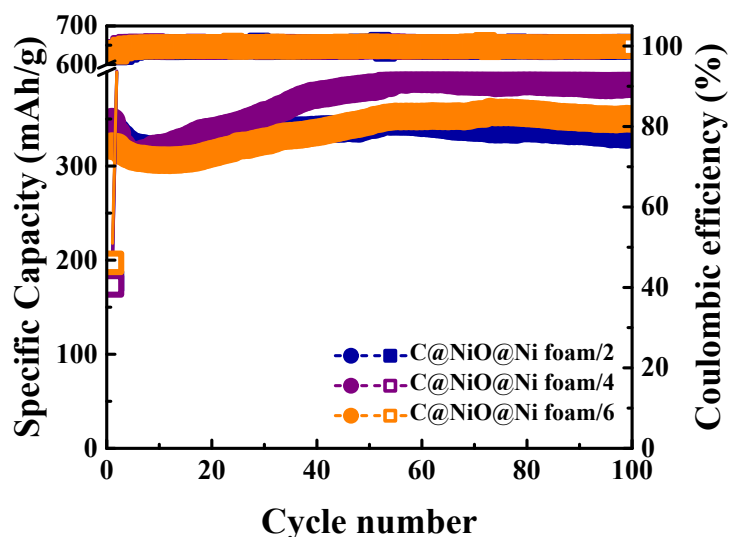

Figure S1. Cycle performance of C@NiO@Ni foam/2, C@NiO@Ni foam/4, and C@NiO@Ni foam/6 at a current density of 1C.

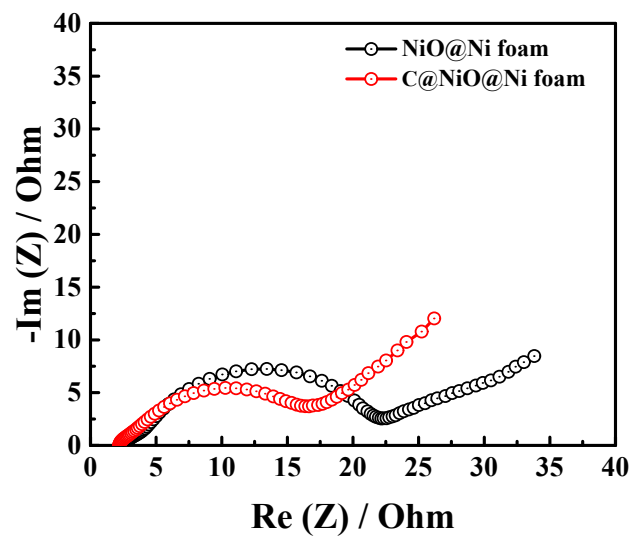

Figure S2. Nyquist plots of the NiO@Ni foam and C@NiO@Ni foam measured after 5<sup>th</sup> cycle.

Table S1. Fitting results of the Nyquist plots of the NiO@Ni foam and C@NiO@Ni foam.

|                      | <i>5<sup>th</sup> cycle</i> |               |                  |
|----------------------|-----------------------------|---------------|------------------|
|                      | $R_s, \Omega$               | $R_f, \Omega$ | $R_{ct}, \Omega$ |
| <i>NiO@Ni foam</i>   | 2.74                        | 4.23          | 14.98            |
| <i>C@NiO@Ni foam</i> | 2.16                        | 4.09          | 11.12            |
